# Supplementary material for: Scaring as a tool to alleviate crop damage by geese: Revealing differences between farmers’ perceptions and the scale of the problem
Source: Springer Nature journal article supplement (doi:10.1007/s13280-016-0891-5), 2017-02-18
Supplement: MOESM1 [file 15654776]

***Ambio***

Electronic Supplementary Material

This supplementary material has not been peer-reviewed

**Title: Scaring as a tool to alleviate crop damage by geese: Revealing differences between farmers' perceptions and the scale of the problem**

Authors: Caroline E. Simonsen, Ingunn M. Tombre, Jesper Madsen

**Supplementary material - Questionnaire**

|                                                                                              |                                     |                                                        |                             |
|----------------------------------------------------------------------------------------------|-------------------------------------|--------------------------------------------------------|-----------------------------|
| <b>Date:</b>                                                                                 |                                     |                                                        |                             |
| <b>Name and address:<br/>(will be treated<br/>confidentially)</b>                            |                                     |                                                        |                             |
| <b>Encircle your choice</b>                                                                  |                                     |                                                        |                             |
| <b>1) Do you scare pink-footed geese from your fields during April and May?</b>              | YES                                 | NO                                                     |                             |
| <i>If YES, continue to question 2, if NO continue to question 5</i>                          |                                     |                                                        |                             |
| <b>2) How often do you scare foraging geese off your fields?</b>                             | More than two times per day         | Two times per day                                      | Less than two times per day |
| <b>3) Which scaring methods do you use? (feel free to mark several methods if necessary)</b> | Approaching on foot                 | Clapping                                               | Shouting                    |
|                                                                                              | Tractor                             | Car                                                    | ATV                         |
|                                                                                              |                                     | Shooting                                               | Flaregun                    |
| <b>4) Choose which crop you primarily protect by scaring geese</b>                           | Grass pasture                       | Stubble field                                          | Newsown cereal              |
| <i>The following is only relevant if you answered NO to scaring geese in question 1</i>      |                                     |                                                        |                             |
| <b>5) What is the main reason you do not scare geese?</b>                                    | There are no geese on my fields     | I get subsidy/compensation from the municipality       |                             |
|                                                                                              | I do not think they cause a problem | I do not think scaring is effective                    |                             |
|                                                                                              | I do not have the time              | I hunt during autumn and would like to see them return |                             |
|                                                                                              | Other reasons:                      |                                                        |                             |
| <b>Feel free to add additional comments:</b>                                                 |                                     |                                                        |                             |
